# Supplementary material for: Tuning of hyperpolarizability, and one- and two-photon absorption of donor–acceptor and donor–acceptor–acceptor-type intramolecular charge transfer-based sensors
Source: Royal Society of Chemistry journal article supplement (doi:10.1039/c9cp03772a), 2019-01-01
Supplement: c9cp03772a1.pdf [file c9cp03772a1.pdf]

## **Electronic Supplementary Information**

### **Tuning of hyperpolarizability, one- and two-photon absorption of donor-acceptor and donor-acceptor-acceptor-type intramolecular charge Transfer-based sensors**

Pralok K. Samanta<sup>‡,1</sup>, Md. Mehboob Alam<sup>2</sup>, Ramprasad Misra<sup>3\*</sup>, Swapan K. Pati<sup>1,4\*</sup>

<sup>1</sup>Theoretical Sciences Unit, and <sup>4</sup>New Chemistry Unit, School of Advanced Materials (SAMat), Jawaharlal Nehru Centre for Advanced Scientific Research, Jakkur P.O., Bengaluru 560064, India

<sup>2</sup>Department of Chemistry, Indian Institute of Technology Bhilai, Chattisgarh 492015, India

<sup>3</sup>Department of Organic Chemistry, Weizmann Institute of Science, Rehovot 76100, Israel

-----  
\*Corresponding authors: ramprasadmisra@gmail.com (RM); pati@jncastr.ac.in (SKP)

‡Present Address: School of Chemical and Bioprocess Engineering, University College Dublin, Dublin 4, Ireland.

**Table S1: The lowest two excitation energies (in eV) of molecules (1-3) at the CAM-B3LYP/6-31+G(d) and CAM-B3LYP/aug-CC-pVDZ Level of Theory.**

| Molecule   | Medium | Excited State  | 6-31+G(d)     | aug-CC-pVDZ   |
|------------|--------|----------------|---------------|---------------|
| Molecule 1 | Vacuum | S <sub>1</sub> | 2.59 (f=2.04) | 2.58 (f=2.03) |
|            |        | S <sub>2</sub> | 3.96 (f=0.01) | 3.95 (f=0.01) |
|            | DCM    | S <sub>1</sub> | 2.47 (f=2.12) | 2.46 (f=2.13) |
|            |        | S <sub>2</sub> | 3.96 (f=0.02) | 3.95 (f=0.02) |
|            | EtOH   | S <sub>1</sub> | 2.51 (f=2.10) | 2.50 (f=2.11) |
|            |        | S <sub>2</sub> | 3.99 (f=0.02) | 3.97 (f=0.02) |
|            | ACN    | S <sub>1</sub> | 2.52 (f=2.09) | 2.51 (f=2.10) |
|            |        | S <sub>2</sub> | 3.99 (f=0.02) | 3.97 (f=0.02) |
| Molecule 2 | Vacuum | S <sub>1</sub> | 3.11 (f=0.43) | 3.08 (f=0.42) |
|            |        | S <sub>2</sub> | 3.20 (f=0.34) | 3.18 (f=0.35) |
|            | DCM    | S <sub>1</sub> | 2.81 (f=0.48) | 2.80 (f=0.48) |
|            |        | S <sub>2</sub> | 3.00 (f=0.52) | 2.98 (f=0.52) |
|            | EtOH   | S <sub>1</sub> | 2.78 (f=0.48) | 2.77 (f=0.48) |
|            |        | S <sub>2</sub> | 3.02 (f=0.50) | 3.00 (f=0.50) |
|            | ACN    | S <sub>1</sub> | 2.78 (f=0.48) | 2.76 (f=0.48) |
|            |        | S <sub>2</sub> | 3.03 (f=0.50) | 3.00 (f=0.50) |
| Molecule 3 | Vacuum | S <sub>1</sub> | 2.65 (f=0.06) | 2.65 (f=0.05) |
|            |        | S <sub>2</sub> | 2.80 (f=1.48) | 2.78 (f=1.47) |
|            | DCM    | S <sub>1</sub> | 2.68 (f=1.48) | 2.66 (f=1.56) |
|            |        | S <sub>2</sub> | 2.74 (f=0.24) | 2.73 (f=0.15) |
|            | EtOH   | S <sub>1</sub> | 2.69 (f=1.29) | 2.67 (f=1.49) |
|            |        | S <sub>2</sub> | 2.73 (f=0.38) | 2.73 (f=0.19) |
|            | ACN    | S <sub>1</sub> | 2.69 (f=1.23) | 2.68 (f=1.45) |
|            |        | S <sub>2</sub> | 2.73 (f=0.43) | 2.73 (f=0.21) |

**Table S2: The values of dipole moments ( $\mu$ ), average polarizability ( $\alpha_{av}$ ) and  $\beta_{total}$  for molecules 1-3 as obtained by using M06-2X/6-31+G(d) Level of Theory.**

| <b>Molecules</b>  | <b>Medium</b> | $\mu$<br>(in Debye) | $\alpha_{av}$<br>(in a.u.) | $\beta_{tot}$<br>(in a.u.) | $\beta_{vec}$<br>(in a.u.) | $\beta_{vec}/\beta_{tot}$ |
|-------------------|---------------|---------------------|----------------------------|----------------------------|----------------------------|---------------------------|
| <b>Molecule 1</b> | Vacuum        | 2.34                | 467.47                     | 25956.85                   | -20896.33                  | -0.81                     |
|                   | DCM           | 2.12                | 627.50                     | 97502.42                   | 8597.18                    | 0.09                      |
|                   | EtOH          | 2.30                | 644.90                     | 109535.04                  | 30221.51                   | 0.28                      |
|                   | ACN           | 2.34                | 649.29                     | 112436.20                  | 32953.05                   | 0.29                      |
| <b>Molecule 2</b> | Vacuum        | 9.58                | 271.49                     | 4673.24                    | -4672.42                   | -1.00                     |
|                   | DCM           | 12.73               | 384.10                     | 18310.23                   | -18310.25                  | -1.00                     |
|                   | EtOH          | 13.17               | 403.23                     | 21338.76                   | -21338.76                  | -1.00                     |
|                   | ACN           | 13.30               | 407.61                     | 22133.49                   | -22133.51                  | -1.00                     |
| <b>Molecule 3</b> | Vacuum        | 8.55                | 569.25                     | 1573.79                    | 490.64                     | 0.31                      |
|                   | DCM           | 13.36               | 759.86                     | 9872.37                    | 8209.36                    | 0.83                      |
|                   | EtOH          | 14.17               | 789.92                     | 11506.15                   | 9375.69                    | 0.81                      |
|                   | ACN           | 14.30               | 794.45                     | 11640.87                   | 9865.13                    | 0.85                      |

**Table S3: Computed values of  $\mu\beta_{||}$  (a.u.) of molecules (1-3) in the gas phase and in the solvents studied.**

| <b>Molecule</b> | <b>Medium</b> | <b><math>\mu\beta_{  }</math> (a.u.)<br/>CAM-B3LYP/<br/>6-31+G(d)</b> | <b><math>\mu\beta_{  }</math> (a.u.)<br/>M06-2X/6-31+G(d)</b> |
|-----------------|---------------|-----------------------------------------------------------------------|---------------------------------------------------------------|
| Molecule 1      | Vacuum        | 11199.02                                                              | 11547.44                                                      |
|                 | DCM           | 2131.36                                                               | 4309.82                                                       |
|                 | EtOH          | 11768.15                                                              | 16411.44                                                      |
|                 | ACN           | 13730.31                                                              | 18198.68                                                      |
| Molecule 2      | Vacuum        | 10250.07                                                              | 10563.26                                                      |
|                 | DCM           | 48136.33                                                              | 55004.89                                                      |
|                 | EtOH          | 58458.02                                                              | 66328.29                                                      |
|                 | ACN           | 60618.58                                                              | 69481.38                                                      |
| Molecule 3      | Vacuum        | 1143.80                                                               | 990.76                                                        |
|                 | DCM           | 26287.19                                                              | 25884.72                                                      |
|                 | EtOH          | 31914.94                                                              | 31360.11                                                      |
|                 | ACN           | 33122.28                                                              | 33291.67                                                      |

### Few state model results for all the three molecules in vacuum phase

The first row and first column represent the labels for the electronic states participated in the few state models. For example, 0 represents the ground state, 1 represents the first excited state, and so on. The values given in  $ij$ -cell ( $i^{\text{th}}$  row and  $j^{\text{th}}$  column) represents the value of  $\delta_{ij}$ . All these  $\delta_{ij}$  are evaluated for the brightest TP active state in respective molecules. Thus, the final state in Molecule 1 and 2 is 2<sup>nd</sup> excited state and that in Molecule 3 is 3<sup>rd</sup> excited state. Total FSM value is given by

$$\delta_{TP}^{FSM} = \sum_{i,j} \delta_{ij}$$

**Table S4: Few state model results for Molecule 1**

| States/States | 0       | 1          | 2        | 3        | 4         |
|---------------|---------|------------|----------|----------|-----------|
| 0             | 3.609   | 869.403    | 1.262    | -0.251   | -5.848    |
| 1             | 869.403 | 401285.169 | 1170.507 | -102.482 | -2324.388 |
| 2             | 1.262   | 1170.507   | 7.125    | -0.328   | -8.774    |
| 3             | -0.251  | -102.482   | -0.328   | 0.028    | 0.655     |
| 4             | -5.848  | -2324.388  | -8.774   | 0.655    | 16.274    |

**Table S5: Few state model results for Molecule 2**

| States/States | 0          | 1         | 2          | 3       | 4        |
|---------------|------------|-----------|------------|---------|----------|
| 0             | 15055.893  | 488.897   | -33142.798 | 31.406  | -160.309 |
| 1             | 488.897    | 142.953   | -1076.217  | 9.239   | -5.206   |
| 2             | -33142.798 | -1076.217 | 72957.817  | -69.135 | 352.892  |
| 3             | 31.406     | 9.239     | -69.135    | 0.598   | -0.334   |
| 4             | -160.309   | -5.206    | 352.892    | -0.334  | 1.707    |

**Table S6: Few state model results for Molecule 3**

| States/States | 0       | 1         | 2         | 3        | 4         |
|---------------|---------|-----------|-----------|----------|-----------|
| 0             | 41.554  | -9.943    | 209.546   | -43.409  | -55.191   |
| 1             | -9.943  | 247.743   | -2055.133 | -1.539   | 342.839   |
| 2             | 209.546 | -2055.133 | 51980.260 | -139.741 | -7084.787 |
| 3             | -43.409 | -1.539    | -139.741  | 45.996   | 43.692    |
| 4             | -55.191 | 342.839   | -7084.787 | 43.692   | 1007.008  |

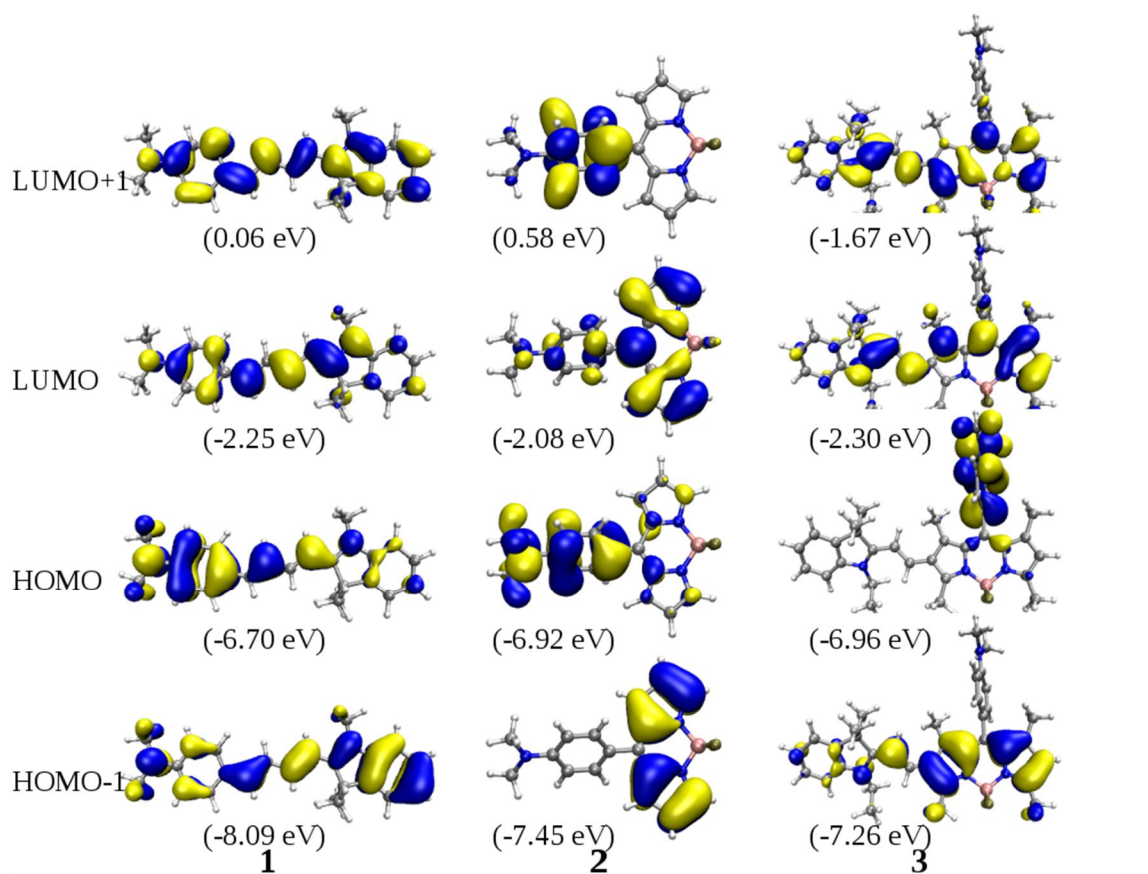

**Figure S1:** The molecular orbital (MO) pictures involved in the absorption process in ethanol. The HOMO, LUMO and (HOMO-1) to LUMO pictures are shown along with the corresponding energy.

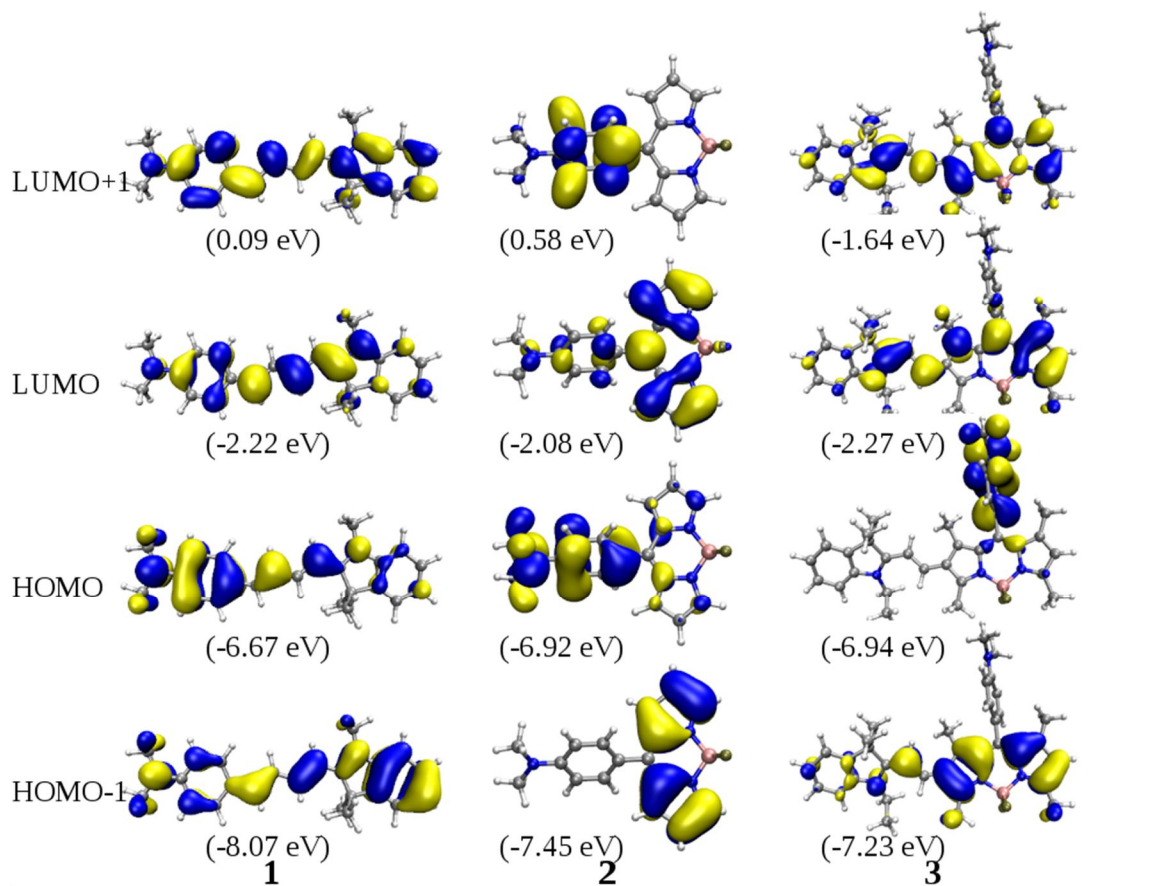

**Figure S2:** The molecular orbital (MO) pictures involved in the absorption process in acetonitrile. The HOMO, LUMO and (HOMO-1) to LUMO pictures along with the corresponding energy are shown.

**Optimized Coordinates using CAM-B3LYP/6-31+G(d)**

**1. Molecule 1/ CAM-B3LYP/6-31G(d)/Gas Phase**

|    |   |   |           |           |           |
|----|---|---|-----------|-----------|-----------|
| 1  | 6 | 0 | -4.913811 | -0.634714 | -0.000051 |
| 2  | 6 | 0 | -5.081524 | 0.744042  | -0.000068 |
| 3  | 6 | 0 | -6.330365 | 1.344624  | -0.000295 |
| 4  | 6 | 0 | -7.440753 | 0.500737  | -0.000490 |
| 5  | 6 | 0 | -7.292603 | -0.884855 | -0.000462 |
| 6  | 6 | 0 | -6.022148 | -1.463525 | -0.000242 |
| 7  | 6 | 0 | -3.436006 | -0.964165 | 0.000233  |
| 8  | 6 | 0 | -2.819461 | 0.437145  | 0.000243  |
| 9  | 1 | 0 | -6.463618 | 2.420463  | -0.000337 |
| 10 | 1 | 0 | -8.434882 | 0.935392  | -0.000670 |
| 11 | 1 | 0 | -8.172692 | -1.519239 | -0.000612 |
| 12 | 1 | 0 | -5.914914 | -2.544369 | -0.000215 |
| 13 | 7 | 0 | -3.798474 | 1.350972  | 0.000141  |
| 14 | 6 | 0 | -3.583584 | 2.789694  | 0.000148  |
| 15 | 1 | 0 | -4.545849 | 3.295814  | 0.000314  |
| 16 | 1 | 0 | -3.030006 | 3.091763  | 0.893093  |
| 17 | 1 | 0 | -3.030253 | 3.091826  | -0.892933 |
| 18 | 6 | 0 | -1.467837 | 0.809116  | 0.000227  |
| 19 | 1 | 0 | -1.242273 | 1.870815  | 0.000173  |
| 20 | 6 | 0 | -0.390319 | -0.058864 | 0.000189  |
| 21 | 1 | 0 | -0.569366 | -1.129785 | 0.000173  |
| 22 | 6 | 0 | 0.954036  | 0.346093  | 0.000140  |
| 23 | 1 | 0 | 1.169767  | 1.411166  | 0.000141  |
| 24 | 6 | 0 | 1.975377  | -0.576164 | 0.000090  |
| 25 | 1 | 0 | 1.681124  | -1.626192 | 0.000092  |
| 26 | 6 | 0 | 3.378183  | -0.343002 | 0.000032  |
| 27 | 6 | 0 | 4.263298  | -1.444878 | -0.000013 |
| 28 | 6 | 0 | 3.962127  | 0.945811  | 0.000018  |
| 29 | 6 | 0 | 5.627568  | -1.289204 | -0.000069 |
| 30 | 1 | 0 | 3.851377  | -2.450794 | 0.000003  |
| 31 | 6 | 0 | 5.321706  | 1.123096  | -0.000037 |
| 32 | 1 | 0 | 3.328844  | 1.827108  | 0.000050  |
| 33 | 6 | 0 | 6.208095  | 0.007649  | -0.000087 |
| 34 | 1 | 0 | 6.256253  | -2.169544 | -0.000090 |
| 35 | 1 | 0 | 5.717243  | 2.130137  | -0.000050 |
| 36 | 7 | 0 | 7.551125  | 0.179278  | -0.000150 |
| 37 | 6 | 0 | 8.125617  | 1.517433  | -0.000068 |
| 38 | 1 | 0 | 9.211385  | 1.437996  | -0.000057 |
| 39 | 1 | 0 | 7.826690  | 2.080770  | -0.891102 |
| 40 | 1 | 0 | 7.826667  | 2.080667  | 0.891023  |



|    |   |   |           |           |           |
|----|---|---|-----------|-----------|-----------|
| 41 | 6 | 0 | 8.439876  | -0.974322 | -0.000232 |
| 42 | 1 | 0 | 9.472126  | -0.628441 | -0.000402 |
| 43 | 1 | 0 | 8.289128  | -1.594082 | 0.890734  |
| 44 | 1 | 0 | 8.288866  | -1.594138 | -0.891111 |
| 45 | 6 | 0 | -3.064061 | -1.748922 | 1.273761  |
| 46 | 1 | 0 | -2.000456 | -1.994237 | 1.308890  |
| 47 | 1 | 0 | -3.316501 | -1.184362 | 2.175467  |
| 48 | 1 | 0 | -3.625625 | -2.686911 | 1.295724  |
| 49 | 6 | 0 | -3.063562 | -1.749075 | -1.273049 |
| 50 | 1 | 0 | -3.315756 | -1.184678 | -2.174926 |
| 51 | 1 | 0 | -1.999912 | -1.994271 | -1.307774 |
| 52 | 1 | 0 | -3.625018 | -2.687127 | -1.295057 |

## 2. Molecule 2/ CAM-B3LYP/6-31G(d)/Gas Phase

|    |   |   |           |           |           |
|----|---|---|-----------|-----------|-----------|
| 1  | 6 | 0 | 0.900827  | -0.008070 | -0.007664 |
| 2  | 6 | 0 | -0.570300 | -0.002888 | -0.003587 |
| 3  | 6 | 0 | -1.273586 | 1.208341  | 0.106284  |
| 4  | 6 | 0 | -1.282161 | -1.209385 | -0.109294 |
| 5  | 7 | 0 | -2.671062 | -1.231150 | -0.080841 |
| 6  | 6 | 0 | -0.835661 | -2.535499 | -0.311035 |
| 7  | 7 | 0 | -2.662435 | 1.239215  | 0.085360  |
| 8  | 6 | 0 | -0.817372 | 2.531361  | 0.306428  |
| 9  | 6 | 0 | -1.961555 | -3.342120 | -0.384054 |
| 10 | 6 | 0 | 3.013351  | 0.822432  | -0.879121 |
| 11 | 6 | 0 | 3.012096  | -0.850704 | 0.855243  |
| 12 | 9 | 0 | -4.401946 | 0.080295  | -1.133491 |
| 13 | 5 | 0 | -3.605002 | 0.007175  | 0.004214  |
| 14 | 6 | 0 | -1.937576 | 3.345290  | 0.386094  |
| 15 | 6 | 0 | 3.748163  | -0.019932 | -0.016990 |
| 16 | 6 | 0 | -3.071630 | -2.494723 | -0.242911 |
| 17 | 6 | 0 | -3.053887 | 2.505282  | 0.250381  |
| 18 | 6 | 0 | 1.629583  | 0.829219  | -0.861670 |
| 19 | 6 | 0 | 1.628214  | -0.848629 | 0.844259  |
| 20 | 9 | 0 | -4.397661 | -0.060616 | 1.145243  |
| 21 | 6 | 0 | 5.846277  | -0.863882 | 0.910928  |
| 22 | 7 | 0 | 5.121922  | -0.031574 | -0.027700 |
| 23 | 6 | 0 | 5.846927  | 0.901075  | -0.866296 |
| 24 | 1 | 0 | 0.195525  | -2.842282 | -0.410292 |
| 25 | 1 | 0 | -1.995592 | -4.411911 | -0.534974 |
| 26 | 1 | 0 | 0.216290  | 2.831403  | 0.400344  |
| 27 | 1 | 0 | 3.524695  | 1.474028  | -1.576271 |
| 28 | 1 | 0 | 3.522412  | -1.500387 | 1.554900  |
| 29 | 1 | 0 | -1.963796 | 4.415180  | 0.537878  |
| 30 | 1 | 0 | -4.126061 | -2.736057 | -0.264400 |
| 31 | 1 | 0 | 1.099509  | 1.476612  | -1.553169 |
| 32 | 1 | 0 | -4.106591 | 2.753460  | 0.277691  |
| 33 | 1 | 0 | 1.097250  | -1.489094 | 1.541531  |
| 34 | 1 | 0 | 6.916206  | -0.755557 | 0.732974  |
| 35 | 1 | 0 | 5.592539  | -1.923328 | 0.785150  |
| 36 | 1 | 0 | 5.644176  | -0.583568 | 1.954125  |
| 37 | 1 | 0 | 6.917306  | 0.745150  | -0.731844 |
| 38 | 1 | 0 | 5.620399  | 1.945652  | -0.611947 |
| 39 | 1 | 0 | 5.617959  | 0.749252  | -1.928232 |

### 3. Molecule 3/ CAM-B3LYP/6-31G(d)/Gas Phase

|    |   |   |           |           |           |
|----|---|---|-----------|-----------|-----------|
| 1  | 6 | 0 | -6.313919 | 1.243693  | 0.301716  |
| 2  | 6 | 0 | -6.411382 | -0.009719 | -0.286009 |
| 3  | 6 | 0 | -7.624579 | -0.592170 | -0.615693 |
| 4  | 6 | 0 | -8.776587 | 0.141891  | -0.332968 |
| 5  | 6 | 0 | -8.699539 | 1.402904  | 0.255508  |
| 6  | 6 | 0 | -7.462693 | 1.965094  | 0.576999  |
| 7  | 6 | 0 | -4.856990 | 1.571303  | 0.517798  |
| 8  | 6 | 0 | -4.175018 | 0.311770  | -0.017933 |
| 9  | 1 | 0 | -7.696918 | -1.574662 | -1.068622 |
| 10 | 1 | 0 | -9.746343 | -0.280461 | -0.574661 |
| 11 | 1 | 0 | -9.610787 | 1.952580  | 0.466690  |
| 12 | 1 | 0 | -7.411526 | 2.949242  | 1.033521  |
| 13 | 7 | 0 | -5.099436 | -0.533406 | -0.478785 |
| 14 | 6 | 0 | -4.892909 | -1.793981 | -1.192222 |
| 15 | 1 | 0 | -5.640989 | -1.827742 | -1.988374 |
| 16 | 1 | 0 | -3.917882 | -1.743211 | -1.679579 |
| 17 | 6 | 0 | -2.771294 | 0.184698  | 0.001132  |
| 18 | 1 | 0 | -2.256916 | 1.111119  | 0.216507  |
| 19 | 6 | 0 | -2.020532 | -0.968958 | -0.104354 |
| 20 | 1 | 0 | -2.555175 | -1.910437 | -0.143635 |
| 21 | 6 | 0 | 2.993969  | -0.397748 | -0.029545 |
| 22 | 6 | 0 | 3.300798  | 1.054207  | -0.075794 |
| 23 | 6 | 0 | 3.121633  | 1.862108  | 1.048840  |
| 24 | 6 | 0 | 3.778031  | 1.653208  | -1.242074 |
| 25 | 6 | 0 | 3.418025  | 3.215127  | 1.020399  |
| 26 | 1 | 0 | 2.755961  | 1.423059  | 1.973550  |
| 27 | 6 | 0 | 4.060545  | 3.008969  | -1.294741 |
| 28 | 1 | 0 | 3.925064  | 1.050098  | -2.134306 |
| 29 | 6 | 0 | 3.891970  | 3.833042  | -0.159434 |
| 30 | 1 | 0 | 3.282032  | 3.794148  | 1.924937  |
| 31 | 1 | 0 | 4.422026  | 3.426247  | -2.225894 |
| 32 | 7 | 0 | 4.175336  | 5.173847  | -0.200363 |
| 33 | 6 | 0 | 4.737519  | 5.759312  | -1.402558 |
| 34 | 1 | 0 | 4.886141  | 6.826982  | -1.244103 |
| 35 | 1 | 0 | 5.708308  | 5.315614  | -1.661757 |
| 36 | 1 | 0 | 4.063565  | 5.640142  | -2.259233 |
| 37 | 6 | 0 | 4.073720  | 5.973432  | 1.005232  |
| 38 | 1 | 0 | 4.336263  | 7.005027  | 0.772873  |
| 39 | 1 | 0 | 3.051812  | 5.971114  | 1.403263  |
| 40 | 1 | 0 | 4.752350  | 5.619373  | 1.793033  |
| 41 | 6 | 0 | -4.432417 | 2.808920  | -0.296174 |
| 42 | 1 | 0 | -3.369473 | 3.028642  | -0.162070 |
| 43 | 1 | 0 | -4.630661 | 2.675599  | -1.363291 |
| 44 | 1 | 0 | -4.999139 | 3.678799  | 0.047195  |
| 45 | 6 | 0 | -4.529793 | 1.767998  | 2.009220  |

|    |   |   |           |           |           |
|----|---|---|-----------|-----------|-----------|
| 46 | 1 | 0 | -4.816187 | 0.893897  | 2.600543  |
| 47 | 1 | 0 | -3.462161 | 1.952398  | 2.157372  |
| 48 | 1 | 0 | -5.080147 | 2.631744  | 2.392731  |
| 49 | 6 | 0 | 0.016106  | -2.383065 | 0.023878  |
| 50 | 6 | 0 | -0.617314 | -1.110506 | -0.088557 |
| 51 | 6 | 0 | 0.428559  | -0.129467 | -0.168078 |
| 52 | 6 | 0 | 1.623257  | -0.833309 | -0.058438 |
| 53 | 7 | 0 | 1.330681  | -2.203943 | 0.043991  |
| 54 | 6 | 0 | 4.017188  | -1.310278 | 0.063956  |
| 55 | 6 | 0 | 5.452970  | -1.134140 | 0.187838  |
| 56 | 6 | 0 | 5.983282  | -2.395001 | 0.275092  |
| 57 | 6 | 0 | 4.923085  | -3.338975 | 0.221312  |
| 58 | 7 | 0 | 3.767017  | -2.694749 | 0.101250  |
| 59 | 1 | 0 | 7.029707  | -2.648633 | 0.382058  |
| 60 | 5 | 0 | 2.373042  | -3.359199 | 0.074422  |
| 61 | 6 | 0 | 5.030362  | -4.819706 | 0.306891  |
| 62 | 1 | 0 | 4.620722  | -5.173889 | 1.258684  |
| 63 | 1 | 0 | 4.454240  | -5.299256 | -0.488809 |
| 64 | 1 | 0 | 6.074367  | -5.129430 | 0.235597  |
| 65 | 6 | 0 | 6.249137  | 0.128745  | 0.244159  |
| 66 | 1 | 0 | 6.269119  | 0.638312  | -0.723103 |
| 67 | 1 | 0 | 5.837638  | 0.837875  | 0.966725  |
| 68 | 1 | 0 | 7.279242  | -0.100559 | 0.527801  |
| 69 | 6 | 0 | 0.206685  | 1.329570  | -0.418663 |
| 70 | 1 | 0 | -0.081119 | 1.860446  | 0.497435  |
| 71 | 1 | 0 | 1.095362  | 1.820255  | -0.807627 |
| 72 | 1 | 0 | -0.596846 | 1.464430  | -1.149223 |
| 73 | 6 | 0 | -0.601496 | -3.735899 | 0.141413  |
| 74 | 1 | 0 | -0.554611 | -4.087724 | 1.177234  |
| 75 | 1 | 0 | -1.646449 | -3.732655 | -0.173733 |
| 76 | 1 | 0 | -0.058275 | -4.458843 | -0.469970 |
| 77 | 6 | 0 | -5.020242 | -3.019314 | -0.292775 |
| 78 | 1 | 0 | -4.291982 | -3.005808 | 0.523230  |
| 79 | 1 | 0 | -6.015747 | -3.080095 | 0.154706  |
| 80 | 1 | 0 | -4.858656 | -3.926102 | -0.882779 |
| 81 | 9 | 0 | 2.235602  | -4.141190 | -1.070804 |
| 82 | 9 | 0 | 2.183605  | -4.130633 | 1.216149  |

**4. Molecule 1/ CAM-B3LYP/6-31G(d)/Dichloromethane**

|    |   |   |           |           |           |
|----|---|---|-----------|-----------|-----------|
| 1  | 6 | 0 | -4.918910 | -0.630701 | -0.000047 |
| 2  | 6 | 0 | -5.075684 | 0.749735  | -0.000061 |
| 3  | 6 | 0 | -6.319643 | 1.361029  | -0.000076 |
| 4  | 6 | 0 | -7.436741 | 0.525221  | -0.000075 |
| 5  | 6 | 0 | -7.299393 | -0.862454 | -0.000056 |
| 6  | 6 | 0 | -6.033115 | -1.451937 | -0.000041 |
| 7  | 6 | 0 | -3.444441 | -0.969429 | -0.000043 |
| 8  | 6 | 0 | -2.821755 | 0.427053  | -0.000043 |
| 9  | 1 | 0 | -6.441589 | 2.437811  | -0.000088 |
| 10 | 1 | 0 | -8.427430 | 0.968035  | -0.000089 |
| 11 | 1 | 0 | -8.184539 | -1.490177 | -0.000058 |
| 12 | 1 | 0 | -5.932415 | -2.533266 | -0.000031 |
| 13 | 7 | 0 | -3.789317 | 1.346476  | -0.000030 |
| 14 | 6 | 0 | -3.564765 | 2.786397  | 0.000024  |
| 15 | 1 | 0 | -4.523727 | 3.297671  | 0.000446  |
| 16 | 1 | 0 | -3.009280 | 3.080515  | 0.893286  |
| 17 | 1 | 0 | -3.009928 | 3.080706  | -0.893583 |
| 18 | 6 | 0 | -1.463151 | 0.792838  | -0.000017 |
| 19 | 1 | 0 | -1.233853 | 1.853271  | -0.000116 |
| 20 | 6 | 0 | -0.397471 | -0.079486 | 0.000118  |
| 21 | 1 | 0 | -0.573142 | -1.150685 | 0.000253  |
| 22 | 6 | 0 | 0.954089  | 0.329553  | 0.000082  |
| 23 | 1 | 0 | 1.164713  | 1.395689  | -0.000044 |
| 24 | 6 | 0 | 1.968595  | -0.590189 | 0.000173  |
| 25 | 1 | 0 | 1.676746  | -1.640380 | 0.000282  |
| 26 | 6 | 0 | 3.379739  | -0.350541 | 0.000121  |
| 27 | 6 | 0 | 4.266558  | -1.447267 | 0.000196  |
| 28 | 6 | 0 | 3.957401  | 0.938278  | -0.000011 |
| 29 | 6 | 0 | 5.634000  | -1.286095 | 0.000135  |
| 30 | 1 | 0 | 3.858665  | -2.454776 | 0.000306  |
| 31 | 6 | 0 | 5.319794  | 1.121113  | -0.000071 |
| 32 | 1 | 0 | 3.321719  | 1.817991  | -0.000073 |
| 33 | 6 | 0 | 6.209813  | 0.010997  | -0.000009 |
| 34 | 1 | 0 | 6.264883  | -2.165245 | 0.000211  |
| 35 | 1 | 0 | 5.710006  | 2.130451  | -0.000184 |
| 36 | 7 | 0 | 7.555699  | 0.188209  | -0.000089 |
| 37 | 6 | 0 | 8.122838  | 1.527946  | -0.000053 |
| 38 | 1 | 0 | 9.208975  | 1.452946  | 0.000023  |
| 39 | 1 | 0 | 7.820420  | 2.091429  | -0.890159 |
| 40 | 1 | 0 | 7.820298  | 2.091425  | 0.890013  |
| 41 | 6 | 0 | 8.446529  | -0.961661 | -0.000076 |
| 42 | 1 | 0 | 9.477515  | -0.612118 | -0.000360 |
| 43 | 1 | 0 | 8.297404  | -1.583825 | 0.889841  |
| 44 | 1 | 0 | 8.297026  | -1.584104 | -0.889729 |
| 45 | 6 | 0 | -3.074976 | -1.757290 | 1.272005  |

|    |   |   |           |           |           |
|----|---|---|-----------|-----------|-----------|
| 46 | 1 | 0 | -2.014247 | -2.013961 | 1.296560  |
| 47 | 1 | 0 | -3.314985 | -1.187564 | 2.173705  |
| 48 | 1 | 0 | -3.647337 | -2.688611 | 1.293967  |
| 49 | 6 | 0 | -3.074976 | -1.757371 | -1.272043 |
| 50 | 1 | 0 | -3.314769 | -1.187599 | -2.173772 |
| 51 | 1 | 0 | -2.014302 | -2.014275 | -1.296484 |
| 52 | 1 | 0 | -3.647518 | -2.688579 | -1.294073 |

**5. Molecule 2/ CAM-B3LYP/6-31G(d)/Dichloromethane**

|    |   |   |           |           |           |
|----|---|---|-----------|-----------|-----------|
| 1  | 6 | 0 | 0.902935  | -0.000146 | -0.000164 |
| 2  | 6 | 0 | -0.561118 | -0.000052 | -0.000087 |
| 3  | 6 | 0 | -1.275599 | 1.210002  | 0.104736  |
| 4  | 6 | 0 | -1.275759 | -1.210021 | -0.104806 |
| 5  | 7 | 0 | -2.666379 | -1.232952 | -0.074775 |
| 6  | 6 | 0 | -0.831028 | -2.532750 | -0.313241 |
| 7  | 7 | 0 | -2.666221 | 1.233096  | 0.074911  |
| 8  | 6 | 0 | -0.830688 | 2.532678  | 0.313137  |
| 9  | 6 | 0 | -1.957991 | -3.343169 | -0.386497 |
| 10 | 6 | 0 | 3.015958  | 0.881049  | -0.825954 |
| 11 | 6 | 0 | 3.015912  | -0.881570 | 0.825505  |
| 12 | 9 | 0 | -4.407490 | 0.064318  | -1.137685 |
| 13 | 5 | 0 | -3.587834 | 0.000128  | 0.000093  |
| 14 | 6 | 0 | -1.957544 | 3.343236  | 0.386487  |
| 15 | 6 | 0 | 3.754170  | -0.000286 | -0.000234 |
| 16 | 6 | 0 | -3.067111 | -2.501675 | -0.241261 |
| 17 | 6 | 0 | -3.066783 | 2.501865  | 0.241438  |
| 18 | 6 | 0 | 1.634257  | 0.884148  | -0.809455 |
| 19 | 6 | 0 | 1.634210  | -0.884537 | 0.809064  |
| 20 | 9 | 0 | -4.407445 | -0.063957 | 1.137904  |
| 21 | 6 | 0 | 5.849369  | -0.933134 | 0.839737  |
| 22 | 7 | 0 | 5.119689  | -0.000369 | -0.000328 |
| 23 | 6 | 0 | 5.849333  | 0.933682  | -0.838986 |
| 24 | 1 | 0 | 0.198820  | -2.841878 | -0.416616 |
| 25 | 1 | 0 | -1.989321 | -4.412661 | -0.540284 |
| 26 | 1 | 0 | 0.199209  | 2.841684  | 0.416385  |
| 27 | 1 | 0 | 3.527007  | 1.563571  | -1.492808 |
| 28 | 1 | 0 | 3.526920  | -1.564219 | 1.492255  |
| 29 | 1 | 0 | -1.988729 | 4.412735  | 0.540251  |
| 30 | 1 | 0 | -4.120046 | -2.749655 | -0.263606 |
| 31 | 1 | 0 | 1.107308  | 1.560315  | -1.474912 |
| 32 | 1 | 0 | -4.119686 | 2.749967  | 0.263929  |
| 33 | 1 | 0 | 1.107226  | -1.560666 | 1.474531  |
| 34 | 1 | 0 | 6.917947  | -0.794699 | 0.680854  |
| 35 | 1 | 0 | 5.602210  | -1.973367 | 0.595518  |
| 36 | 1 | 0 | 5.639957  | -0.769509 | 1.904207  |
| 37 | 1 | 0 | 6.917910  | 0.795336  | -0.680008 |
| 38 | 1 | 0 | 5.601785  | 1.973567  | -0.593615 |
| 39 | 1 | 0 | 5.640296  | 0.771243  | -1.903694 |

**6. Molecule 3/ CAM-B3LYP/6-31G(d)/Dichloromethane**

|    |   |   |           |           |           |
|----|---|---|-----------|-----------|-----------|
| 1  | 6 | 0 | -6.296952 | 1.187678  | 0.406956  |
| 2  | 6 | 0 | -6.391153 | 0.014114  | -0.328074 |
| 3  | 6 | 0 | -7.599477 | -0.520595 | -0.744810 |
| 4  | 6 | 0 | -8.753266 | 0.179140  | -0.391248 |
| 5  | 6 | 0 | -8.680720 | 1.360737  | 0.346455  |
| 6  | 6 | 0 | -7.447731 | 1.876853  | 0.751000  |
| 7  | 6 | 0 | -4.841854 | 1.479694  | 0.674379  |
| 8  | 6 | 0 | -4.165149 | 0.290673  | -0.000757 |
| 9  | 1 | 0 | -7.665225 | -1.439464 | -1.315871 |
| 10 | 1 | 0 | -9.720436 | -0.206856 | -0.696121 |
| 11 | 1 | 0 | -9.593612 | 1.885339  | 0.609088  |
| 12 | 1 | 0 | -7.400995 | 2.799668  | 1.321153  |
| 13 | 7 | 0 | -5.077378 | -0.488243 | -0.564786 |
| 14 | 6 | 0 | -4.863178 | -1.663555 | -1.414780 |
| 15 | 1 | 0 | -5.575714 | -1.583953 | -2.238794 |
| 16 | 1 | 0 | -3.866413 | -1.579426 | -1.848105 |
| 17 | 6 | 0 | -2.751037 | 0.153026  | 0.012420  |
| 18 | 1 | 0 | -2.233544 | 1.063525  | 0.283161  |
| 19 | 6 | 0 | -2.020790 | -0.992832 | -0.149234 |
| 20 | 1 | 0 | -2.555827 | -1.930694 | -0.246211 |
| 21 | 6 | 0 | 2.987889  | -0.389127 | -0.031951 |
| 22 | 6 | 0 | 3.275838  | 1.064866  | -0.093873 |
| 23 | 6 | 0 | 3.026860  | 1.893003  | 1.002426  |
| 24 | 6 | 0 | 3.802988  | 1.646339  | -1.247587 |
| 25 | 6 | 0 | 3.300598  | 3.250669  | 0.958037  |
| 26 | 1 | 0 | 2.622741  | 1.467867  | 1.917187  |
| 27 | 6 | 0 | 4.061488  | 3.006304  | -1.317400 |
| 28 | 1 | 0 | 4.008771  | 1.026873  | -2.116347 |
| 29 | 6 | 0 | 3.814280  | 3.852737  | -0.213247 |
| 30 | 1 | 0 | 3.109545  | 3.845181  | 1.842329  |
| 31 | 1 | 0 | 4.463794  | 3.408616  | -2.238325 |
| 32 | 7 | 0 | 4.058404  | 5.203127  | -0.277328 |
| 33 | 6 | 0 | 4.745182  | 5.754645  | -1.431133 |
| 34 | 1 | 0 | 4.840093  | 6.832809  | -1.305919 |
| 35 | 1 | 0 | 5.752127  | 5.332181  | -1.557284 |
| 36 | 1 | 0 | 4.179651  | 5.575753  | -2.351778 |
| 37 | 6 | 0 | 3.949965  | 6.011332  | 0.923395  |
| 38 | 1 | 0 | 4.162272  | 7.050226  | 0.672483  |
| 39 | 1 | 0 | 2.937170  | 5.970352  | 1.337959  |
| 40 | 1 | 0 | 4.655631  | 5.694241  | 1.704448  |
| 41 | 6 | 0 | -4.401965 | 2.801475  | 0.014246  |
| 42 | 1 | 0 | -3.339013 | 2.994123  | 0.181773  |
| 43 | 1 | 0 | -4.592793 | 2.793839  | -1.062273 |
| 44 | 1 | 0 | -4.966156 | 3.626968  | 0.456387  |
| 45 | 6 | 0 | -4.519909 | 1.492641  | 2.180324  |



|    |   |   |           |           |           |
|----|---|---|-----------|-----------|-----------|
| 46 | 1 | 0 | -4.814494 | 0.554532  | 2.658576  |
| 47 | 1 | 0 | -3.451453 | 1.650648  | 2.349906  |
| 48 | 1 | 0 | -5.065434 | 2.309074  | 2.661043  |
| 49 | 6 | 0 | 0.031652  | -2.393083 | 0.016664  |
| 50 | 6 | 0 | -0.602415 | -1.130756 | -0.119476 |
| 51 | 6 | 0 | 0.426586  | -0.149054 | -0.205298 |
| 52 | 6 | 0 | 1.635700  | -0.841860 | -0.067442 |
| 53 | 7 | 0 | 1.351967  | -2.212613 | 0.053468  |
| 54 | 6 | 0 | 4.030463  | -1.290153 | 0.084541  |
| 55 | 6 | 0 | 5.451499  | -1.094342 | 0.226425  |
| 56 | 6 | 0 | 6.001755  | -2.352690 | 0.334697  |
| 57 | 6 | 0 | 4.961471  | -3.306090 | 0.278401  |
| 58 | 7 | 0 | 3.793147  | -2.674819 | 0.134388  |
| 59 | 1 | 0 | 7.050533  | -2.588147 | 0.458869  |
| 60 | 5 | 0 | 2.407240  | -3.341679 | 0.116866  |
| 61 | 6 | 0 | 5.091709  | -4.785411 | 0.384366  |
| 62 | 1 | 0 | 4.665107  | -5.141877 | 1.327389  |
| 63 | 1 | 0 | 4.555830  | -5.287385 | -0.425395 |
| 64 | 1 | 0 | 6.144110  | -5.072129 | 0.347861  |
| 65 | 6 | 0 | 6.235891  | 0.176730  | 0.284454  |
| 66 | 1 | 0 | 6.292768  | 0.661984  | -0.693858 |
| 67 | 1 | 0 | 5.790557  | 0.899317  | 0.972688  |
| 68 | 1 | 0 | 7.255078  | -0.039328 | 0.614583  |
| 69 | 6 | 0 | 0.198868  | 1.300589  | -0.497680 |
| 70 | 1 | 0 | -0.031109 | 1.868712  | 0.411496  |
| 71 | 1 | 0 | 1.067707  | 1.765735  | -0.958141 |
| 72 | 1 | 0 | -0.647154 | 1.413148  | -1.181453 |
| 73 | 6 | 0 | -0.615998 | -3.731327 | 0.143206  |
| 74 | 1 | 0 | -0.968695 | -3.891124 | 1.168145  |
| 75 | 1 | 0 | -1.479085 | -3.812565 | -0.522310 |
| 76 | 1 | 0 | 0.078088  | -4.533250 | -0.102370 |
| 77 | 6 | 0 | -5.053265 | -2.979005 | -0.668424 |
| 78 | 1 | 0 | -4.368706 | -3.070598 | 0.179108  |
| 79 | 1 | 0 | -6.072697 | -3.075947 | -0.286641 |
| 80 | 1 | 0 | -4.865812 | -3.809658 | -1.354145 |
| 81 | 9 | 0 | 2.284802  | -4.175316 | -1.007464 |
| 82 | 9 | 0 | 2.222828  | -4.108268 | 1.276499  |

## 7. Molecule 1/ CAM-B3LYP/6-31G(d)/Ethanol

|    |   |   |           |           |           |
|----|---|---|-----------|-----------|-----------|
| 1  | 6 | 0 | -4.916856 | -0.633148 | -0.000033 |
| 2  | 6 | 0 | -5.076692 | 0.747074  | -0.000066 |
| 3  | 6 | 0 | -6.321971 | 1.355846  | -0.000251 |
| 4  | 6 | 0 | -7.437340 | 0.517642  | -0.000387 |
| 5  | 6 | 0 | -7.296995 | -0.869860 | -0.000341 |
| 6  | 6 | 0 | -6.029369 | -1.456851 | -0.000164 |
| 7  | 6 | 0 | -3.441453 | -0.968144 | 0.000180  |
| 8  | 6 | 0 | -2.822994 | 0.430039  | 0.000161  |
| 9  | 1 | 0 | -6.445860 | 2.432369  | -0.000305 |
| 10 | 1 | 0 | -8.428949 | 0.958488  | -0.000534 |
| 11 | 1 | 0 | -8.180774 | -1.499596 | -0.000446 |
| 12 | 1 | 0 | -5.926761 | -2.538014 | -0.000129 |
| 13 | 7 | 0 | -3.792018 | 1.346689  | 0.000091  |
| 14 | 6 | 0 | -3.571041 | 2.787526  | 0.000091  |
| 15 | 1 | 0 | -4.531314 | 3.296144  | 0.000476  |
| 16 | 1 | 0 | -3.016362 | 3.082401  | 0.893379  |
| 17 | 1 | 0 | -3.016974 | 3.082515  | -0.893545 |
| 18 | 6 | 0 | -1.464270 | 0.799287  | 0.000132  |
| 19 | 1 | 0 | -1.236982 | 1.860124  | 0.000035  |
| 20 | 6 | 0 | -0.399746 | -0.072551 | 0.000152  |
| 21 | 1 | 0 | -0.575380 | -1.143577 | 0.000205  |
| 22 | 6 | 0 | 0.953472  | 0.336452  | 0.000096  |
| 23 | 1 | 0 | 1.164128  | 1.402612  | 0.000050  |
| 24 | 6 | 0 | 1.965720  | -0.584152 | 0.000096  |
| 25 | 1 | 0 | 1.673041  | -1.634079 | 0.000141  |
| 26 | 6 | 0 | 3.378832  | -0.346169 | 0.000040  |
| 27 | 6 | 0 | 4.263174  | -1.444248 | 0.000032  |
| 28 | 6 | 0 | 3.958718  | 0.941183  | -0.000006 |
| 29 | 6 | 0 | 5.631497  | -1.285587 | -0.000024 |
| 30 | 1 | 0 | 3.853341  | -2.450960 | 0.000083  |
| 31 | 6 | 0 | 5.322115  | 1.121617  | -0.000058 |
| 32 | 1 | 0 | 3.324469  | 1.821952  | -0.000004 |
| 33 | 6 | 0 | 6.209984  | 0.010094  | -0.000079 |
| 34 | 1 | 0 | 6.260365  | -2.166213 | 0.000002  |
| 35 | 1 | 0 | 5.713994  | 2.130385  | -0.000108 |
| 36 | 7 | 0 | 7.556894  | 0.184189  | -0.000150 |
| 37 | 6 | 0 | 8.127102  | 1.522509  | 0.000103  |
| 38 | 1 | 0 | 9.213054  | 1.444945  | 0.000297  |
| 39 | 1 | 0 | 7.825999  | 2.087265  | -0.889691 |
| 40 | 1 | 0 | 7.825675  | 2.087045  | 0.889923  |
| 41 | 6 | 0 | 8.444292  | -0.968229 | -0.000303 |
| 42 | 1 | 0 | 9.476306  | -0.621748 | -0.000699 |
| 43 | 1 | 0 | 8.293188  | -1.590262 | 0.889430  |
| 44 | 1 | 0 | 8.292591  | -1.590431 | -0.889807 |
| 45 | 6 | 0 | -3.070511 | -1.754199 | 1.273186  |

|    |   |   |           |           |           |
|----|---|---|-----------|-----------|-----------|
| 46 | 1 | 0 | -2.009348 | -2.008791 | 1.299180  |
| 47 | 1 | 0 | -3.312116 | -1.183379 | 2.173785  |
| 48 | 1 | 0 | -3.641189 | -2.686465 | 1.295883  |
| 49 | 6 | 0 | -3.070159 | -1.754386 | -1.272602 |
| 50 | 1 | 0 | -3.311522 | -1.183704 | -2.173354 |
| 51 | 1 | 0 | -2.008984 | -2.008968 | -1.298260 |
| 52 | 1 | 0 | -3.640820 | -2.686662 | -1.295315 |

### 8. Molecule 2/ CAM-B3LYP/6-31G(d)/Ethanol

|    |   |   |           |           |           |
|----|---|---|-----------|-----------|-----------|
| 1  | 6 | 0 | 0.903185  | 0.000034  | 0.000032  |
| 2  | 6 | 0 | -0.559649 | 0.000020  | -0.000001 |
| 3  | 6 | 0 | -1.275245 | -1.210397 | -0.103502 |
| 4  | 6 | 0 | -1.275293 | 1.210416  | 0.103461  |
| 5  | 7 | 0 | -2.666163 | 1.232825  | 0.071601  |
| 6  | 6 | 0 | -0.831747 | 2.532809  | 0.314012  |
| 7  | 7 | 0 | -2.666115 | -1.232855 | -0.071722 |
| 8  | 6 | 0 | -0.831640 | -2.532765 | -0.314087 |
| 9  | 6 | 0 | -1.959375 | 3.343190  | 0.386290  |
| 10 | 6 | 0 | 3.016405  | -0.887819 | 0.819340  |
| 11 | 6 | 0 | 3.016440  | 0.887875  | -0.819205 |
| 12 | 9 | 0 | -4.408246 | -0.060581 | 1.137904  |
| 13 | 5 | 0 | -3.585622 | -0.000040 | 0.000044  |
| 14 | 6 | 0 | -1.959236 | -3.343178 | -0.386486 |
| 15 | 6 | 0 | 3.755209  | 0.000060  | 0.000111  |
| 16 | 6 | 0 | -3.067740 | 2.502049  | 0.238873  |
| 17 | 6 | 0 | -3.067638 | -2.502089 | -0.239039 |
| 18 | 6 | 0 | 1.635084  | -0.890998 | 0.802405  |
| 19 | 6 | 0 | 1.635117  | 0.891045  | -0.802334 |
| 20 | 9 | 0 | -4.408532 | 0.060458  | -1.137604 |
| 21 | 6 | 0 | 5.849826  | 0.939105  | -0.833211 |
| 22 | 7 | 0 | 5.119542  | 0.000128  | 0.000147  |
| 23 | 6 | 0 | 5.849938  | -0.939188 | 0.833034  |
| 24 | 1 | 0 | 0.197491  | 2.843095  | 0.419683  |
| 25 | 1 | 0 | -1.990920 | 4.412574  | 0.540812  |
| 26 | 1 | 0 | 0.197616  | -2.843003 | -0.419734 |
| 27 | 1 | 0 | 3.527004  | -1.575678 | 1.481095  |
| 28 | 1 | 0 | 3.527075  | 1.575678  | -1.480997 |
| 29 | 1 | 0 | -1.990737 | -4.412552 | -0.541087 |
| 30 | 1 | 0 | -4.120614 | 2.750491  | 0.260449  |
| 31 | 1 | 0 | 1.108759  | -1.572311 | 1.463025  |
| 32 | 1 | 0 | -4.120502 | -2.750570 | -0.260665 |
| 33 | 1 | 0 | 1.108822  | 1.572318  | -1.463018 |
| 34 | 1 | 0 | 6.918172  | 0.799536  | -0.674465 |
| 35 | 1 | 0 | 5.601924  | 1.977287  | -0.581857 |
| 36 | 1 | 0 | 5.640901  | 0.782430  | -1.898678 |
| 37 | 1 | 0 | 6.918273  | -0.799151 | 0.674635  |
| 38 | 1 | 0 | 5.602425  | -1.977306 | 0.580995  |
| 39 | 1 | 0 | 5.640743  | -0.783233 | 1.898545  |

### 9. Molecule 3/ CAM-B3LYP/6-31G(d)/Ethanol

|    |   |   |           |           |           |
|----|---|---|-----------|-----------|-----------|
| 1  | 6 | 0 | -6.299161 | 1.186248  | 0.398396  |
| 2  | 6 | 0 | -6.389972 | 0.009354  | -0.331659 |
| 3  | 6 | 0 | -7.596527 | -0.529572 | -0.748102 |
| 4  | 6 | 0 | -8.752109 | 0.169878  | -0.399750 |
| 5  | 6 | 0 | -8.682998 | 1.355091  | 0.332832  |
| 6  | 6 | 0 | -7.451646 | 1.875075  | 0.737648  |
| 7  | 6 | 0 | -4.845251 | 1.481272  | 0.667933  |
| 8  | 6 | 0 | -4.165855 | 0.292167  | -0.003113 |
| 9  | 1 | 0 | -7.659623 | -1.450999 | -1.315226 |
| 10 | 1 | 0 | -9.718039 | -0.219139 | -0.704810 |
| 11 | 1 | 0 | -9.597339 | 1.879329  | 0.591283  |
| 12 | 1 | 0 | -7.407182 | 2.800170  | 1.304231  |
| 13 | 7 | 0 | -5.074795 | -0.491238 | -0.563977 |
| 14 | 6 | 0 | -4.857574 | -1.674142 | -1.403157 |
| 15 | 1 | 0 | -5.569807 | -1.603536 | -2.228078 |
| 16 | 1 | 0 | -3.860902 | -1.592123 | -1.836609 |
| 17 | 6 | 0 | -2.749870 | 0.157813  | 0.010428  |
| 18 | 1 | 0 | -2.234327 | 1.071408  | 0.274330  |
| 19 | 6 | 0 | -2.019752 | -0.987015 | -0.145469 |
| 20 | 1 | 0 | -2.552729 | -1.926010 | -0.240697 |
| 21 | 6 | 0 | 2.989905  | -0.388177 | -0.031564 |
| 22 | 6 | 0 | 3.278361  | 1.065271  | -0.092440 |
| 23 | 6 | 0 | 3.013828  | 1.895106  | 0.999171  |
| 24 | 6 | 0 | 3.820290  | 1.645593  | -1.240102 |
| 25 | 6 | 0 | 3.285724  | 3.253011  | 0.955881  |
| 26 | 1 | 0 | 2.597735  | 1.471414  | 1.909202  |
| 27 | 6 | 0 | 4.076465  | 3.006041  | -1.309275 |
| 28 | 1 | 0 | 4.038943  | 1.024995  | -2.104892 |
| 29 | 6 | 0 | 3.811915  | 3.854252  | -0.210334 |
| 30 | 1 | 0 | 3.081338  | 3.848717  | 1.836320  |
| 31 | 1 | 0 | 4.490247  | 3.407259  | -2.225586 |
| 32 | 7 | 0 | 4.050774  | 5.205700  | -0.274351 |
| 33 | 6 | 0 | 4.754391  | 5.757050  | -1.418273 |
| 34 | 1 | 0 | 4.838049  | 6.836551  | -1.296730 |
| 35 | 1 | 0 | 5.766849  | 5.342079  | -1.523932 |
| 36 | 1 | 0 | 4.207199  | 5.569039  | -2.347968 |
| 37 | 6 | 0 | 3.928428  | 6.014695  | 0.924918  |
| 38 | 1 | 0 | 4.139676  | 7.053984  | 0.674856  |
| 39 | 1 | 0 | 2.912077  | 5.970499  | 1.330084  |
| 40 | 1 | 0 | 4.627790  | 5.700396  | 1.712756  |
| 41 | 6 | 0 | -4.405943 | 2.803278  | 0.008114  |
| 42 | 1 | 0 | -3.344735 | 2.999732  | 0.181891  |
| 43 | 1 | 0 | -4.590318 | 2.793069  | -1.069479 |
| 44 | 1 | 0 | -4.975714 | 3.626968  | 0.446372  |
| 45 | 6 | 0 | -4.526585 | 1.496093  | 2.174841  |

|    |   |   |           |           |           |
|----|---|---|-----------|-----------|-----------|
| 46 | 1 | 0 | -4.821032 | 0.558009  | 2.653275  |
| 47 | 1 | 0 | -3.458661 | 1.655979  | 2.345815  |
| 48 | 1 | 0 | -5.074431 | 2.312780  | 2.652512  |
| 49 | 6 | 0 | 0.032013  | -2.386579 | 0.027971  |
| 50 | 6 | 0 | -0.599424 | -1.124252 | -0.113389 |
| 51 | 6 | 0 | 0.429289  | -0.145331 | -0.204794 |
| 52 | 6 | 0 | 1.639326  | -0.839370 | -0.064004 |
| 53 | 7 | 0 | 1.353476  | -2.209468 | 0.062414  |
| 54 | 6 | 0 | 4.033617  | -1.291238 | 0.081398  |
| 55 | 6 | 0 | 5.453315  | -1.097737 | 0.221947  |
| 56 | 6 | 0 | 6.003256  | -2.358235 | 0.323992  |
| 57 | 6 | 0 | 4.962911  | -3.309349 | 0.266627  |
| 58 | 7 | 0 | 3.794061  | -2.675344 | 0.127319  |
| 59 | 1 | 0 | 7.052207  | -2.594728 | 0.444953  |
| 60 | 5 | 0 | 2.407425  | -3.338136 | 0.118277  |
| 61 | 6 | 0 | 5.091777  | -4.789406 | 0.368606  |
| 62 | 1 | 0 | 4.682926  | -5.146414 | 1.319339  |
| 63 | 1 | 0 | 4.541169  | -5.290375 | -0.431735 |
| 64 | 1 | 0 | 6.142943  | -5.077657 | 0.313009  |
| 65 | 6 | 0 | 6.240297  | 0.171755  | 0.285806  |
| 66 | 1 | 0 | 6.307501  | 0.655774  | -0.692516 |
| 67 | 1 | 0 | 5.790653  | 0.896017  | 0.969469  |
| 68 | 1 | 0 | 7.256027  | -0.046616 | 0.625085  |
| 69 | 6 | 0 | 0.203355  | 1.302700  | -0.505752 |
| 70 | 1 | 0 | -0.022906 | 1.876983  | 0.400380  |
| 71 | 1 | 0 | 1.071775  | 1.762569  | -0.972572 |
| 72 | 1 | 0 | -0.644900 | 1.412257  | -1.187142 |
| 73 | 6 | 0 | -0.623090 | -3.721048 | 0.157771  |
| 74 | 1 | 0 | -1.032235 | -3.850111 | 1.165854  |
| 75 | 1 | 0 | -1.450415 | -3.819065 | -0.550165 |
| 76 | 1 | 0 | 0.080344  | -4.530619 | -0.027638 |
| 77 | 6 | 0 | -5.045910 | -2.982057 | -0.643289 |
| 78 | 1 | 0 | -4.362119 | -3.064065 | 0.205831  |
| 79 | 1 | 0 | -6.065816 | -3.076810 | -0.262261 |
| 80 | 1 | 0 | -4.855817 | -3.818656 | -1.320903 |
| 81 | 9 | 0 | 2.275361  | -4.173542 | -1.005802 |
| 82 | 9 | 0 | 2.230316  | -4.109273 | 1.278244  |

**10. Molecule 1/ CAM-B3LYP/6-31G(d)/Acetonitrile**

|    |   |   |           |           |           |
|----|---|---|-----------|-----------|-----------|
| 1  | 6 | 0 | 4.917110  | -0.632312 | 0.000026  |
| 2  | 6 | 0 | 5.075914  | 0.747922  | 0.000053  |
| 3  | 6 | 0 | 6.320752  | 1.357532  | 0.000131  |
| 4  | 6 | 0 | 7.436675  | 0.520035  | 0.000170  |
| 5  | 6 | 0 | 7.297276  | -0.867641 | 0.000134  |
| 6  | 6 | 0 | 6.030038  | -1.455418 | 0.000062  |
| 7  | 6 | 0 | 3.441964  | -0.968428 | -0.000039 |
| 8  | 6 | 0 | 2.822549  | 0.429414  | -0.000033 |
| 9  | 1 | 0 | 6.443911  | 2.434118  | 0.000167  |
| 10 | 1 | 0 | 8.427985  | 0.961571  | 0.000232  |
| 11 | 1 | 0 | 8.181516  | -1.496731 | 0.000166  |
| 12 | 1 | 0 | 5.927737  | -2.536581 | 0.000039  |
| 13 | 7 | 0 | 3.790767  | 1.346630  | -0.000012 |
| 14 | 6 | 0 | 3.568890  | 2.787460  | -0.000029 |
| 15 | 1 | 0 | 4.528871  | 3.296493  | -0.000401 |
| 16 | 1 | 0 | 3.014019  | 3.081806  | -0.893305 |
| 17 | 1 | 0 | 3.014605  | 3.081936  | 0.893572  |
| 18 | 6 | 0 | 1.463476  | 0.798001  | -0.000032 |
| 19 | 1 | 0 | 1.235865  | 1.858722  | 0.000056  |
| 20 | 6 | 0 | 0.399916  | -0.074541 | -0.000110 |
| 21 | 1 | 0 | 0.576691  | -1.145298 | -0.000206 |
| 22 | 6 | 0 | -0.953851 | 0.333239  | -0.000071 |
| 23 | 1 | 0 | -1.165277 | 1.399229  | 0.000019  |
| 24 | 6 | 0 | -1.965554 | -0.587597 | -0.000130 |
| 25 | 1 | 0 | -1.673036 | -1.637530 | -0.000216 |
| 26 | 6 | 0 | -3.378834 | -0.348831 | -0.000083 |
| 27 | 6 | 0 | -4.264296 | -1.445952 | -0.000137 |
| 28 | 6 | 0 | -3.957473 | 0.939033  | 0.000017  |
| 29 | 6 | 0 | -5.632606 | -1.285861 | -0.000084 |
| 30 | 1 | 0 | -3.855347 | -2.453038 | -0.000229 |
| 31 | 6 | 0 | -5.320718 | 1.120800  | 0.000069  |
| 32 | 1 | 0 | -3.322592 | 1.819344  | 0.000059  |
| 33 | 6 | 0 | -6.209658 | 0.010296  | 0.000032  |
| 34 | 1 | 0 | -6.262704 | -2.165682 | -0.000152 |
| 35 | 1 | 0 | -5.711683 | 2.129954  | 0.000158  |
| 36 | 7 | 0 | -7.556349 | 0.186150  | 0.000107  |
| 37 | 6 | 0 | -8.124632 | 1.525338  | -0.000019 |
| 38 | 1 | 0 | -9.210672 | 1.449414  | -0.000144 |
| 39 | 1 | 0 | -7.822508 | 2.089551  | 0.889769  |
| 40 | 1 | 0 | -7.822303 | 2.089459  | -0.889793 |
| 41 | 6 | 0 | -8.445449 | -0.964984 | 0.000152  |
| 42 | 1 | 0 | -9.476947 | -0.616996 | 0.000505  |
| 43 | 1 | 0 | -8.295323 | -1.587313 | -0.889570 |
| 44 | 1 | 0 | -8.294828 | -1.587582 | 0.889594  |
| 45 | 6 | 0 | 3.071673  | -1.754798 | -1.273104 |

|    |   |   |          |           |           |
|----|---|---|----------|-----------|-----------|
| 46 | 1 | 0 | 2.010652 | -2.009886 | -1.299460 |
| 47 | 1 | 0 | 3.313078 | -1.183783 | -2.173640 |
| 48 | 1 | 0 | 3.642779 | -2.686822 | -1.295903 |
| 49 | 6 | 0 | 3.071576 | -1.754876 | 1.272947  |
| 50 | 1 | 0 | 3.312862 | -1.183893 | 2.173535  |
| 51 | 1 | 0 | 2.010565 | -2.010016 | 1.299184  |
| 52 | 1 | 0 | 3.642720 | -2.686876 | 1.295762  |



**11. Molecule 2/ CAM-B3LYP/6-31G(d)/Acetonitrile**

|    |   |   |           |           |           |
|----|---|---|-----------|-----------|-----------|
| 1  | 6 | 0 | 0.903255  | 0.000036  | 0.000018  |
| 2  | 6 | 0 | -0.559324 | 0.000022  | -0.000007 |
| 3  | 6 | 0 | -1.275220 | 1.210430  | 0.103726  |
| 4  | 6 | 0 | -1.275179 | -1.210412 | -0.103710 |
| 5  | 7 | 0 | -2.666077 | -1.232773 | -0.071723 |
| 6  | 6 | 0 | -0.831716 | -2.532807 | -0.314059 |
| 7  | 7 | 0 | -2.666120 | 1.232738  | 0.071768  |
| 8  | 6 | 0 | -0.831814 | 2.532830  | 0.314173  |
| 9  | 6 | 0 | -1.959424 | -3.343257 | -0.386093 |
| 10 | 6 | 0 | 3.016538  | 0.890417  | -0.816692 |
| 11 | 6 | 0 | 3.016521  | -0.890350 | 0.816768  |
| 12 | 9 | 0 | -4.408436 | 0.060973  | -1.137720 |
| 13 | 5 | 0 | -3.585288 | -0.000029 | -0.000047 |
| 14 | 6 | 0 | -1.959555 | 3.343226  | 0.386287  |
| 15 | 6 | 0 | 3.755268  | 0.000039  | 0.000048  |
| 16 | 6 | 0 | -3.067714 | -2.502162 | -0.238791 |
| 17 | 6 | 0 | -3.067807 | 2.502120  | 0.238763  |
| 18 | 6 | 0 | 1.635298  | 0.893447  | -0.799897 |
| 19 | 6 | 0 | 1.635281  | -0.893382 | 0.799942  |
| 20 | 9 | 0 | -4.408633 | -0.061052 | 1.137479  |
| 21 | 6 | 0 | 5.849813  | -0.943019 | 0.828855  |
| 22 | 7 | 0 | 5.119357  | 0.000065  | 0.000052  |
| 23 | 6 | 0 | 5.849742  | 0.942970  | -0.829015 |
| 24 | 1 | 0 | 0.197517  | -2.843251 | -0.419205 |
| 25 | 1 | 0 | -1.990970 | -4.412671 | -0.540361 |
| 26 | 1 | 0 | 0.197404  | 2.843301  | 0.419388  |
| 27 | 1 | 0 | 3.527537  | 1.579760  | -1.476474 |
| 28 | 1 | 0 | 3.527499  | -1.579696 | 1.476558  |
| 29 | 1 | 0 | -1.991146 | 4.412622  | 0.540675  |
| 30 | 1 | 0 | -4.120563 | -2.750715 | -0.260113 |
| 31 | 1 | 0 | 1.109126  | 1.576235  | -1.459042 |
| 32 | 1 | 0 | -4.120665 | 2.750640  | 0.260027  |
| 33 | 1 | 0 | 1.109094  | -1.576183 | 1.459061  |
| 34 | 1 | 0 | 6.918103  | -0.802237 | 0.671020  |
| 35 | 1 | 0 | 5.602245  | -1.979965 | 0.572107  |
| 36 | 1 | 0 | 5.640459  | -0.791879 | 1.895000  |
| 37 | 1 | 0 | 6.918046  | 0.802232  | -0.671233 |
| 38 | 1 | 0 | 5.602185  | 1.979962  | -0.572457 |
| 39 | 1 | 0 | 5.640297  | 0.791611  | -1.895114 |

**12. Molecule 3/ CAM-B3LYP/6-31G(d)/Acetonitrile**

|    |   |   |           |           |           |
|----|---|---|-----------|-----------|-----------|
| 1  | 6 | 0 | -6.292179 | 1.186809  | 0.402358  |
| 2  | 6 | 0 | -6.390313 | 0.008504  | -0.324429 |
| 3  | 6 | 0 | -7.600815 | -0.530585 | -0.729019 |
| 4  | 6 | 0 | -8.752871 | 0.170169  | -0.371639 |
| 5  | 6 | 0 | -8.676440 | 1.356792  | 0.357977  |
| 6  | 6 | 0 | -7.441174 | 1.877010  | 0.750512  |
| 7  | 6 | 0 | -4.835813 | 1.480506  | 0.659466  |
| 8  | 6 | 0 | -4.163424 | 0.288919  | -0.014427 |
| 9  | 1 | 0 | -7.669279 | -1.453214 | -1.293557 |
| 10 | 1 | 0 | -9.721728 | -0.218947 | -0.667118 |
| 11 | 1 | 0 | -9.588106 | 1.882021  | 0.623780  |
| 12 | 1 | 0 | -7.391025 | 2.803179  | 1.314851  |
| 13 | 7 | 0 | -5.077707 | -0.494264 | -0.566223 |
| 14 | 6 | 0 | -4.869016 | -1.681431 | -1.401448 |
| 15 | 1 | 0 | -5.589686 | -1.615479 | -2.219298 |
| 16 | 1 | 0 | -3.876894 | -1.601729 | -1.845682 |
| 17 | 6 | 0 | -2.747380 | 0.151976  | -0.009045 |
| 18 | 1 | 0 | -2.229356 | 1.065156  | 0.251322  |
| 19 | 6 | 0 | -2.019023 | -0.993558 | -0.166057 |
| 20 | 1 | 0 | -2.552450 | -1.932289 | -0.260821 |
| 21 | 6 | 0 | 2.989021  | -0.387310 | -0.035421 |
| 22 | 6 | 0 | 3.274430  | 1.066686  | -0.094663 |
| 23 | 6 | 0 | 2.998032  | 1.896295  | 0.994230  |
| 24 | 6 | 0 | 3.824324  | 1.647969  | -1.238010 |
| 25 | 6 | 0 | 3.267508  | 3.254808  | 0.953096  |
| 26 | 1 | 0 | 2.573943  | 1.471860  | 1.900183  |
| 27 | 6 | 0 | 4.077872  | 3.008979  | -1.305441 |
| 28 | 1 | 0 | 4.051080  | 1.027824  | -2.101005 |
| 29 | 6 | 0 | 3.802952  | 3.856748  | -0.208642 |
| 30 | 1 | 0 | 3.053808  | 3.850471  | 1.831388  |
| 31 | 1 | 0 | 4.497209  | 3.411180  | -2.218786 |
| 32 | 7 | 0 | 4.040835  | 5.208256  | -0.270821 |
| 33 | 6 | 0 | 4.751828  | 5.760605  | -1.409704 |
| 34 | 1 | 0 | 4.836707  | 6.839699  | -1.285583 |
| 35 | 1 | 0 | 5.764143  | 5.344073  | -1.510197 |
| 36 | 1 | 0 | 4.209946  | 5.575014  | -2.343084 |
| 37 | 6 | 0 | 3.903067  | 6.018410  | 0.925918  |
| 38 | 1 | 0 | 4.114492  | 7.057911  | 0.676937  |
| 39 | 1 | 0 | 2.882382  | 5.972072  | 1.319831  |
| 40 | 1 | 0 | 4.594384  | 5.706852  | 1.721877  |
| 41 | 6 | 0 | -4.399993 | 2.800479  | -0.006732 |
| 42 | 1 | 0 | -3.337067 | 2.995601  | 0.157586  |
| 43 | 1 | 0 | -4.593493 | 2.788182  | -1.082704 |
| 44 | 1 | 0 | -4.964837 | 3.625928  | 0.434650  |
| 45 | 6 | 0 | -4.505661 | 1.497813  | 2.163850  |

|    |   |   |           |           |           |
|----|---|---|-----------|-----------|-----------|
| 46 | 1 | 0 | -4.799306 | 0.561618  | 2.646515  |
| 47 | 1 | 0 | -3.436069 | 1.654700  | 2.326699  |
| 48 | 1 | 0 | -5.047401 | 2.317327  | 2.643625  |
| 49 | 6 | 0 | 0.034738  | -2.391354 | 0.012578  |
| 50 | 6 | 0 | -0.598174 | -1.130355 | -0.133551 |
| 51 | 6 | 0 | 0.429158  | -0.150135 | -0.223073 |
| 52 | 6 | 0 | 1.640003  | -0.841674 | -0.075426 |
| 53 | 7 | 0 | 1.356024  | -2.212000 | 0.052127  |
| 54 | 6 | 0 | 4.034304  | -1.288186 | 0.084818  |
| 55 | 6 | 0 | 5.452324  | -1.091502 | 0.234304  |
| 56 | 6 | 0 | 6.004458  | -2.350979 | 0.340727  |
| 57 | 6 | 0 | 4.966782  | -3.304215 | 0.277397  |
| 58 | 7 | 0 | 3.797295  | -2.672691 | 0.130165  |
| 59 | 1 | 0 | 7.053124  | -2.585128 | 0.468640  |
| 60 | 5 | 0 | 2.411945  | -3.337908 | 0.117143  |
| 61 | 6 | 0 | 5.098412  | -4.784002 | 0.380431  |
| 62 | 1 | 0 | 4.672933  | -5.143947 | 1.322655  |
| 63 | 1 | 0 | 4.564976  | -5.285711 | -0.431116 |
| 64 | 1 | 0 | 6.151379  | -5.068576 | 0.343916  |
| 65 | 6 | 0 | 6.236656  | 0.179424  | 0.302714  |
| 66 | 1 | 0 | 6.311326  | 0.662073  | -0.675726 |
| 67 | 1 | 0 | 5.780379  | 0.903834  | 0.981734  |
| 68 | 1 | 0 | 7.249959  | -0.036876 | 0.650545  |
| 69 | 6 | 0 | 0.202573  | 1.296845  | -0.528526 |
| 70 | 1 | 0 | -0.027641 | 1.872966  | 0.375382  |
| 71 | 1 | 0 | 1.072303  | 1.756549  | -0.993070 |
| 72 | 1 | 0 | -0.643144 | 1.403708  | -1.213456 |
| 73 | 6 | 0 | -0.618315 | -3.726740 | 0.142827  |
| 74 | 1 | 0 | -1.018140 | -3.860299 | 1.154084  |
| 75 | 1 | 0 | -1.451842 | -3.822653 | -0.557873 |
| 76 | 1 | 0 | 0.083995  | -4.535042 | -0.052515 |
| 77 | 6 | 0 | -5.049417 | -2.984835 | -0.631821 |
| 78 | 1 | 0 | -4.357692 | -3.060870 | 0.211351  |
| 79 | 1 | 0 | -6.065757 | -3.077765 | -0.240915 |
| 80 | 1 | 0 | -4.864940 | -3.825464 | -1.305977 |
| 81 | 9 | 0 | 2.287050  | -4.178916 | -1.003837 |
| 82 | 9 | 0 | 2.230941  | -4.104936 | 1.279581  |
